# Supplementary material for: Estimating cropland requirements for global food system scenario modeling
Source: Frontiers journal article supplement (doi:10.3389/fsufs.2022.1063419), 2022-12-16
Supplement: Data_Sheet_2.XLSX [file Data_Sheet_2.XLSX]

## Sheet: Sheet1
Supplementary material 2: contribution of plant foods to global nutrient availability, as calculated by the DELTA Model (version 1.3)
	Cereals	Fruit	Nuts	Oilcrops	Other Plant	Pulses	Starchy Roots	Sugar	Vegetables
Energy	42.6492	3.00485	0.510965	13.3175	3.3861	1.59693	4.35751	7.90884	3.57994
Carbohydrates	61.4291	5.15935	<0.5	0.695007	1.52736	1.91182	6.90336	13.9745	5.35424
Fat	6.40869	0.530115	1.37187	43.7107	0.97438	<0.5	<0.5	<0.5	0.667065
Protein	38.8097	0.88418	0.520503	3.79266	1.42013	3.46909	1.59796	<0.5	5.71853
Fibre	38.7	11.3153	0.758895	5.24072	3.07658	8.43749	10.5852	0	21.8361
Calcium	8.93884	3.25907	<0.5	3.5935	4.21323	1.33014	3.04102	1.67882	16.2381
Copper	38.8296	4.70201	1.99039	8.48642	3.91632	5.4683	7.49032	0.627976	12.8741
Iron	36.3345	2.72101	0.860158	7.03222	6.73537	5.78154	5.83474	0.873387	13.8626
Magnesium	44.7555	4.38789	1.23806	5.65339	5.95305	3.14768	6.3711	<0.5	13.0957
Phosphorus	39.1947	1.75075	0.810283	3.93673	2.20179	3.03785	4.1035	<0.5	8.64007
Potassium	17.4101	8.90251	0.52522	3.40697	6.56337	3.50923	15.0437	0.53907	22.2648
Selenium	54.5628	0.566654	<0.5	2.63769	0.911077	<0.5	0.620379	<0.5	3.79932
Zinc	40.9876	1.28131	0.83404	4.37649	2.09679	3.89093	3.43191	<0.5	9.28254
Cystine	52.7164	0.710134	0.565247	3.83663	0.521362	2.77659	1.71715	0	3.8737
Histidine	37.3421	0.962324	0.527271	4.17362	0.379458	3.58364	1.28262	0	2.82058
Leucine	39.2944	<0.5	0.534227	3.81583	0.409907	3.39478	1.1385	0	2.33811
Lysine	20.6755	0.644444	<0.5	3.34222	0.33823	4.60592	1.54941	0	2.79843
Methionine	36.409	0.648792	<0.5	2.71344	<0.5	1.79687	1.27256	0	3.12038
Threonine	31.7339	0.593874	<0.5	3.98499	<0.5	3.46209	1.57275	0	4.73308
Tryptophan	40.5962	<0.5	0.559958	3.74377	<0.5	2.92145	1.8412	0	3.85835
Vitamin A	0.149144	2.90521	<0.5	<0.5	0.873677	<0.5	13.723	0	35.691
Vitamin B1	41.4111	3.44146	0.711973	4.9934	2.26522	5.66092	6.16544	<0.5	11.9574
Vitamin B12	0	0	0	0	<0.5	0	0	0	<0.5
Vitamin B2	14.5214	6.00704	0.526953	1.78297	12.8025	2.40077	2.88902	0.588234	10.6135
Vitamin B5	42.7287	3.59477	<0.5	2.27643	5.66767	2.86379	5.00708	<0.5	10.0053
Vitamin B6	29.8056	6.84279	0.65974	1.93883	3.11083	2.25644	12.2655	<0.5	21.1493
Vitamin B9	21.8293	5.36601	<0.5	7.71607	5.02758	14.836	5.92837	<0.5	27.4228
Vitamin C	0.894262	25.0101	<0.5	0.624128	1.57224	1.85416	15.8038	0	49.8812
Vitamin E	7.56549	2.96949	2.11144	65.4844	1.30685	0.62005	1.55914	0	11.8974
